# Supplementary material for: Complete genome sequences of bacteriophages P12002L and P12002S, two lytic phages that infect a marine Polaribacter strain
Source: PubMed Central journal article supplement (PMC4615864; doi:10.1186/s40793-015-0076-z), 2015-10-19
Supplement: 40793_2015_76_MOESM1_ESM.pdf [file 40793_2015_76_MOESM1_ESM.pdf]

Table S1. Annotation of ORFs predicted in the P12002L genome

| ORF | Position (strand) | Length (aa) | Predicted function              | Best BLASTp hit from NCBI nr (organism, accession number, bitscore)                    | Pfam, COG, signal peptide (SP), and transmembrane helix (TM)                                                   |
|-----|-------------------|-------------|---------------------------------|----------------------------------------------------------------------------------------|----------------------------------------------------------------------------------------------------------------|
| 1   | 88-726 (+)        | 212         | Terminase small subunit         | hypothetical protein ( <i>Mesoflavibacter zeaxanthinifaciens</i> , WP_027880403, 53.9) | PF03592 (Terminase small subunit)                                                                              |
| 2   | 1035-1154 (+)     | 39          |                                 | lipoyl synthase ( <i>Buchnera aphidicola</i> , WP_025368908, 33.1)                     |                                                                                                                |
| 3   | 1289-1474 (+)     | 61          |                                 | hypothetical protein ( <i>Sulfuricurvum kujiense</i> , WP_013449842, 37)               |                                                                                                                |
| 4   | 1477-1692 (+)     | 71          |                                 | hypothetical protein ( <i>Reticulomyxa filosa</i> , ETO20733, 38.1)                    |                                                                                                                |
| 5   | 1757-1984 (+)     | 75          |                                 | MULTISPECIES: hypothetical protein ( <i>Arcobacter</i> , WP_026807899, 36.2)           |                                                                                                                |
| 6   | 1965-2288 (+)     | 107         |                                 | hypothetical protein ( <i>Clostridium symbiosum</i> , WP_003502009, 37)                |                                                                                                                |
| 7   | 2257-2454 (+)     | 65          |                                 | hypothetical protein ( <i>Salmonella enterica</i> , WP_010892316, 32.7)                |                                                                                                                |
| 8   | 2580-4142 (+)     | 520         | Probable A1 protein             | A1-like protein ( <i>Cellulophaga</i> phage phi4:1, YP_008240608, 316.6)               |                                                                                                                |
| 9   | 4201-4401 (+)     | 66          |                                 | hypothetical protein ( <i>Knoellia aerolata</i> DSM 18566, KGN40035, 38.5)             |                                                                                                                |
| 10  | 4402-4596 (+)     | 64          |                                 | hypothetical protein ( <i>Flavobacterium</i> phage 11b, YP_112537, 77)                 | PF11753 (Protein of unknown function)                                                                          |
| 11  | 4609-4782 (+)     | 57          |                                 | predicted protein ( <i>Verticillium alfalfae</i> VaMs.102, XP_003004765, 32.7)         |                                                                                                                |
| 12  | 4794-5108 (+)     | 104         |                                 | hypothetical protein ( <i>Elizabethkingia meningoseptica</i> , KGT09513, 56.2)         |                                                                                                                |
| 13  | 5260-6801 (+)     | 513         | Terminase large subunit         | phage portal protein ( <i>Bacteroides cellulosilyticus</i> , WP_007219331, 444.1)      | PF04466 (Phage terminase large subunit), PF03237 (Terminase-like family)                                       |
| 14  | 6898-8610 (+)     | 570         |                                 | hypothetical protein ( <i>Robiginitalea biformata</i> , WP_015755469, 428.7)           |                                                                                                                |
| 15  | 8588-8890 (+)     | 100         |                                 | hypothetical protein ( <i>Methylobacterium nodulans</i> , WP_015929254, 39.7)          |                                                                                                                |
| 16  | 8902-9720 (+)     | 272         |                                 | hypothetical protein ( <i>Robiginitalea biformata</i> , WP_041327287, 98.2)            |                                                                                                                |
| 17  | 9755-10777 (+)    | 340         |                                 | hypothetical protein ( <i>Robiginitalea biformata</i> , WP_015755466, 236.1)           |                                                                                                                |
| 18  | 10779-11414 (+)   | 211         |                                 | hypothetical protein ( <i>Robiginitalea biformata</i> , WP_015755465, 135.2)           |                                                                                                                |
| 19  | 11368-11901 (+)   | 177         |                                 | hypothetical protein ( <i>Flavobacterium</i> sp. CF136, WP_007804420, 102.8)           |                                                                                                                |
| 20  | 11903-12106 (+)   | 67          |                                 |                                                                                        |                                                                                                                |
| 21  | 12109-13032 (+)   | 307         |                                 | hypothetical protein ( <i>Chryseobacterium</i> sp. YR480, WP_047425770, 45.4)          |                                                                                                                |
| 22  | 13184-13696 (+)   | 170         | HNH endonuclease                | HNH endonuclease ( <i>Gramella forsetii</i> , WP_011710355, 122.9)                     | PF07463 (NUMOD4 motif), PF13392 (HNH endonuclease), PF00847 (AP2 domain)                                       |
| 23  | 13709-14215 (+)   | 168         |                                 | hypothetical protein ( <i>Robiginitalea biformata</i> , WP_015755461, 49.3)            | COG1713                                                                                                        |
| 24  | 15093-14812 (-)   | 93          |                                 | protein methyltransferase FrzF ( <i>Myxococcus xanthus</i> , WP_011554141, 35)         |                                                                                                                |
| 25  | 15356-15982 (+)   | 208         |                                 | hypothetical protein ( <i>Chryseobacterium</i> sp. OV259, WP_034758591, 44.7)          |                                                                                                                |
| 26  | 15972-19346 (+)   | 1124        | Tail length tape measure domain | tape measure domain (uncultured Mediterranean phage uvMED, BAQ84149, 302.7)            | PF02463 (RecF/RecN/SMC N terminal domain), PF05483 (Synaptonemal complex protein 1), COG3941, COG1196, COG5022 |
| 27  | 19349-21577 (+)   | 742         |                                 | structural protein ( <i>Cellulophaga</i> phage phi19:1, YP_008241790, 263.5)           |                                                                                                                |
| 28  | 21577-23616 (+)   | 679         |                                 | structural protein ( <i>Cellulophaga</i> phage phi19:1, YP_008241791, 179.5)           |                                                                                                                |
| 29  | 23617-26610 (+)   | 997         |                                 | hypothetical protein ( <i>Mesorhizobium plurifarium</i> , WP_041005494, 165.3)         |                                                                                                                |
| 30  | 26628-26915 (+)   | 95          |                                 | hypothetical protein ( <i>Kordia algicida</i> , WP_007093059, 49.3)                    | 2 TM                                                                                                           |

|    |                 |     |                                                              |                                                                                                               |                                                                                                 |
|----|-----------------|-----|--------------------------------------------------------------|---------------------------------------------------------------------------------------------------------------|-------------------------------------------------------------------------------------------------|
| 31 | 26905-27528 (+) | 207 |                                                              | hypothetical protein ( <i>Genlisea aurea</i> , EPS66458, 38.5)                                                | TM                                                                                              |
| 32 | 27531-27917 (+) | 128 | carboxypeptidase                                             | hypothetical protein ( <i>Bizionia argentinensis</i> , WP_040287984, 110.2)                                   | PF13539 (D-alanyl-D-alanine carboxypeptidase)                                                   |
| 33 | 28031-28516 (+) | 161 | HNH endonuclease                                             | HNH endonuclease ( <i>Gramella forsetii</i> , WP_011710355, 124.8)                                            | PF07463 (NUMOD4 motif), PF13392 (HNH endonuclease), PF00847 (AP2 domain)                        |
| 34 | 28524-29165 (+) | 213 |                                                              | hypothetical protein ( <i>Flavobacterium rivuli</i> , WP_020212237, 100.1)                                    | SP                                                                                              |
| 35 | 29973-29248 (-) | 241 | Adenine-specific methyltransferase                           | hypothetical protein ( <i>Acinetobacter lwoffii</i> , WP_005103760, 281.6)                                    | PF01555 (DNA methylase), COG0863, COG2189, COG2521                                              |
| 36 | 30848-30078 (-) | 256 | Type III restriction-modification system methylation subunit | DNA methylase ( <i>Cellulophaga</i> phage phi12:1, YP_008240985, 316.2)                                       | PF01555 (DNA methylase), COG0863, COG2189                                                       |
| 37 | 31255-30965 (-) | 96  |                                                              | hypothetical protein ( <i>Phytophthora parasitica</i> P1569, ET155211, 37.4)                                  |                                                                                                 |
| 38 | 32126-31326 (-) | 266 | Adenine-specific methyltransferase                           | DNA methylase ( <i>Vibrio</i> phage pYD38-B, YP_008130270, 242.7)                                             | PF01555 ((DNA methylase), COG0863, COG2189                                                      |
| 39 | 32098-32271 (+) | 57  |                                                              |                                                                                                               |                                                                                                 |
| 40 | 32455-32279 (-) | 58  |                                                              | hypothetical protein ( <i>Pseudocercospora fijiensis</i> CIRAD86, XP_007923413, 35.8)                         |                                                                                                 |
| 41 | 32638-32486 (-) | 50  |                                                              | hypothetical protein ( <i>Perkinsela</i> sp. CCAP 1560/4, KNH05471, 35.8)                                     |                                                                                                 |
| 42 | 32917-32693 (-) | 74  |                                                              | Hermansky-Pudlak syndrome 6 protein, partial ( <i>Nestor notabilis</i> , XP_010009980, 34.7)                  |                                                                                                 |
| 43 | 33700-32933 (-) | 255 |                                                              | hypothetical protein ( <i>Cellulophaga</i> phage phi18:3, YP_008241198, 85.5)                                 |                                                                                                 |
| 44 | 34375-33707 (-) | 222 | Replication protein                                          | DNA-binding protein ( <i>Campylobacter</i> sp. FOBRC14, WP_009651041, 120.9)                                  | PF13730 (Helix-turn-helix domain)                                                               |
| 45 | 34893-34489 (-) | 134 |                                                              | hypothetical protein ( <i>Polaribacter</i> sp. Hel_I_88, WP_026776786, 100.9)                                 | PF01503 (Phosphoribosyl-ATP pyrophosphohydrolase)                                               |
| 46 | 35382-34903 (-) | 159 | chromosome replication initiation protein DnaA               | chromosomal replication initiator protein DnaA ( <i>Lachnospiraceae</i> bacterium ND2006, WP_035638943, 60.8) | PF08299 (Bacterial dnaA protein helix-turn-helix), COG0593                                      |
| 47 | 35503-35372 (-) | 43  |                                                              |                                                                                                               |                                                                                                 |
| 48 | 35700-35470 (-) | 76  |                                                              | hypothetical protein ( <i>Pedobacter</i> sp. BMA, WP_047801173, 40)                                           |                                                                                                 |
| 49 | 35863-35675 (-) | 62  |                                                              |                                                                                                               |                                                                                                 |
| 50 | 36309-35863 (-) | 148 |                                                              | hypothetical protein ( <i>Eremothecium cymbalariae</i> DBVPG#7215, XP_003645407, 37.7)                        |                                                                                                 |
| 51 | 36973-36311 (-) | 220 | NinG recombination protein                                   | hypothetical protein, partial ( <i>Proteobacteria</i> bacterium JGI 0000113-P07, WP_036929766, 77)            | PF05766 (Bacteriophage Lambda NinG protein)                                                     |
| 52 | 37199-36951 (-) | 82  |                                                              | unnamed protein product ( <i>Sordaria macrospora</i> k-hell, CCC10760, 37)                                    |                                                                                                 |
| 53 | 38015-37305 (-) | 236 | DNA modification protein                                     | gp178 (uncultured Mediterranean phage uvMED, BAR35039, 183)                                                   |                                                                                                 |
| 54 | 38816-38118 (-) | 232 | DNA methylase                                                | DNA methylase ( <i>Cellulophaga</i> phage phi12:1, YP_008241004, 338.6)                                       | PF02086 (D12 class N6 adenine-specific DNA methyltransferase), PF01555 (DNA methylase), COG0338 |
| 55 | 39099-38950 (-) | 49  |                                                              |                                                                                                               |                                                                                                 |
| 56 | 39480-39253 (-) | 75  |                                                              | hypothetical protein ( <i>Cellulophaga</i> phage phi19:1, YP_008241803, 53.5)                                 |                                                                                                 |
| 57 | 39664-39530 (-) | 44  |                                                              |                                                                                                               |                                                                                                 |

|    |                 |     |                  |                                                                                                          |                                                                   |
|----|-----------------|-----|------------------|----------------------------------------------------------------------------------------------------------|-------------------------------------------------------------------|
| 58 | 39995-39708 (-) | 95  |                  | MULTISPECIES: hypothetical protein ( <i>Pseudomonas putida</i> group, WP_019751570, 36.6)                |                                                                   |
| 59 | 40502-40062 (-) | 146 | HNH endonuclease | HNH endonuclease ( <i>Streptococcus constellatus</i> , WP_048800727, 131.3)                              | PF01844 (HNH endonuclease), COG1403                               |
| 60 | 40896-40567 (-) | 109 |                  | UDP-N-acetylglucosamine 2-epimerase ( <i>Paulinella chromatophora</i> , YP_002049387, 39.3)              |                                                                   |
| 61 | 41779-41006 (-) | 257 |                  | hypothetical protein ( <i>Flavobacterium</i> phage FCL-2, YP_009140550, 106.3)                           | TM                                                                |
| 62 | 42449-41784 (-) | 221 |                  | hypothetical protein, partial ( <i>Candidatus Caldatribacteirum californiense</i> , WP_017890182, 77.4)  | PF04098 (Rad52/22 family double-strand break repair protein)      |
| 63 | 42600-42463 (-) | 45  |                  | hypothetical protein ( <i>Rhizopus microsporus</i> , CEI91090, 36.2)                                     | PF09889 (Uncharacterized protein containing a Zn-ribbon), COG4068 |
| 64 | 42796-42587 (-) | 69  |                  | hypothetical protein ( <i>Corynebacterium kroppenstedtii</i> DSM 44385, ACR18580, 34.7)                  |                                                                   |
| 65 | 42970-42827 (-) | 47  |                  | MerR family transcriptional regulator ( <i>Clostridium tetanomorphum</i> , WP_035151379, 35)             |                                                                   |
| 66 | 43183-42974 (-) | 69  |                  | sam/hd domain protein, putative ( <i>Entamoeba invadens</i> IP1, XP_004260964, 33.9)                     |                                                                   |
| 67 | 43383-43246 (-) | 45  |                  |                                                                                                          |                                                                   |
| 68 | 43541-43380 (-) | 53  |                  |                                                                                                          |                                                                   |
| 69 | 43931-43542 (-) | 129 |                  | hypothetical protein (uncultured Mediterranean phage uvMED, BAQ92845, 62)                                |                                                                   |
| 70 | 44158-43946 (-) | 70  |                  |                                                                                                          |                                                                   |
| 71 | 44821-44162 (-) | 219 |                  | hypothetical protein ( <i>Elizabethkingia anophelis</i> , WP_024566412, 62.4)                            |                                                                   |
| 72 | 45125-44835 (-) | 96  |                  | hypothetical protein ( <i>Enterococcus caccae</i> ATCC BAA-1240, EOL45101, 37.4)                         |                                                                   |
| 73 | 45339-45130 (-) | 69  |                  | polysaccharide biosynthesis protein CapD ( <i>Listeria cornellensis</i> FSL F6-969, EUJ25228, 36.2)      |                                                                   |
| 74 | 45774-45442 (-) | 110 |                  |                                                                                                          |                                                                   |
| 75 | 45957-45787 (-) | 56  |                  | twin-arginine translocation protein subunit TatB ( <i>Desulfovibrio salexigens</i> , WP_015851433, 33.5) |                                                                   |
| 76 | 46332-46027 (-) | 101 |                  | hypothetical protein ( <i>Calothrix</i> sp. PCC 7103, WP_019495525, 37.4)                                |                                                                   |
| 77 | 46573-46340 (-) | 77  |                  | hypothetical protein ( <i>Zavarzinella formosa</i> , WP_029630428, 60.8)                                 |                                                                   |
| 78 | 46914-46585 (-) | 109 |                  | UNKNOWN ( <i>Stylonychia lemnae</i> , CDW79434, 37)                                                      | TM                                                                |
| 79 | 47177-46947 (-) | 76  |                  |                                                                                                          |                                                                   |
| 80 | 47427-47239 (-) | 62  |                  |                                                                                                          |                                                                   |
| 81 | 47706-47485 (-) | 73  |                  | hypothetical protein ( <i>Listeria</i> phage LP-037, YP_008240523, 45.8)                                 |                                                                   |
| 82 | 48107-47961 (-) | 48  |                  |                                                                                                          |                                                                   |

COG and Pfam were searched by RPS-BLAST against CDD. Additional Pfam search was performed by hmmscan during HMMER analysis. SP and TM were predicted by the Phobius program as implemented at the HMMER web server.

Table S2. Annotation of ORFs predicted in the P12002S genome

| ORF | Position (strand) | Length (aa) | Predicted function              | Best BLASTp hit from NCBI nr (organism, accession number, bitscore)                | Pfam, COG, signal peptide (SP), and transmembrane helix (TM)                                |
|-----|-------------------|-------------|---------------------------------|------------------------------------------------------------------------------------|---------------------------------------------------------------------------------------------|
| 1   | 54-710 (+)        | 218         | Terminase small subunit         | phage small terminase ( <i>Gramella forsetii</i> , WP_011710310, 55.5)             |                                                                                             |
| 2   | 1019-1138 (+)     | 39          |                                 | lipoyl synthase ( <i>Buchnera aphidicola</i> , WP_025368908, 33.1)                 |                                                                                             |
| 3   | 1273-1458 (+)     | 61          |                                 | hypothetical protein ( <i>Sulfuricurvum kujiense</i> , WP_013449842, 37)           |                                                                                             |
| 4   | 1461-1676 (+)     | 71          |                                 | hypothetical protein ( <i>Reticulomyxa filosa</i> , ETO20733, 38.1)                |                                                                                             |
| 5   | 1741-1968 (+)     | 75          |                                 | MULTISPECIES: hypothetical protein ( <i>Arcobacter</i> , WP_026807899, 36.2)       |                                                                                             |
| 6   | 1949-2272 (+)     | 107         |                                 | hypothetical protein ( <i>Clostridium symbiosum</i> , WP_003502009, 37)            |                                                                                             |
| 7   | 2241-2438 (+)     | 65          |                                 | hypothetical protein (uncultured marine thaumarchaeote KM3_78_A04, AIF17572, 33.1) |                                                                                             |
| 8   | 2564-4126 (+)     | 520         | Probable A1 protein             | A1-like protein ( <i>Cellulophaga</i> phage phi4:1, YP_008240608, 316.6)           |                                                                                             |
| 9   | 4185-4385 (+)     | 66          |                                 | hypothetical protein ( <i>Knoellia aerolata</i> DSM 18566, KGN40035, 38.5)         |                                                                                             |
| 10  | 4386-4580 (+)     | 64          |                                 | hypothetical protein ( <i>Flavobacterium</i> phage 11b, YP_112537, 77)             | PF11753 (Protein of unknown function)                                                       |
| 11  | 4593-4766 (+)     | 57          |                                 | predicted protein ( <i>Verticillium alfalfae</i> VaMs.102, XP_003004765, 32.7)     |                                                                                             |
| 12  | 4778-5092 (+)     | 104         |                                 | hypothetical protein ( <i>Elizabethkingia meningoseptica</i> , KGT09513, 56.2)     |                                                                                             |
| 13  | 5244-6785 (+)     | 513         | Terminase large subunit         | phage portal protein ( <i>Bacteroides cellulosilyticus</i> , WP_007219331, 444.1)  | PF04466 (Phage terminase large subunit), PF03237 (Terminase-like family)                    |
| 14  | 6882-8594 (+)     | 570         |                                 | hypothetical protein ( <i>Robiginitalea biformata</i> , WP_015755469, 428.7)       |                                                                                             |
| 15  | 8572-8874 (+)     | 100         |                                 | hypothetical protein ( <i>Methylobacterium nodulans</i> , WP_015929254, 39.7)      |                                                                                             |
| 16  | 8886-9704 (+)     | 272         |                                 | hypothetical protein ( <i>Robiginitalea biformata</i> , WP_041327287, 98.2)        |                                                                                             |
| 17  | 9739-10761 (+)    | 340         |                                 | hypothetical protein ( <i>Robiginitalea biformata</i> , WP_015755466, 236.1)       |                                                                                             |
| 18  | 10763-11398 (+)   | 211         |                                 | hypothetical protein ( <i>Robiginitalea biformata</i> , WP_015755465, 135.2)       |                                                                                             |
| 19  | 11352-11885 (+)   | 177         |                                 | hypothetical protein ( <i>Flavobacterium</i> sp. CF136, WP_007804420, 102.8)       |                                                                                             |
| 20  | 11887-12090 (+)   | 67          |                                 |                                                                                    |                                                                                             |
| 21  | 12093-13016 (+)   | 307         |                                 | hypothetical protein ( <i>Chryseobacterium</i> sp. YR480, WP_047425770, 45.4)      |                                                                                             |
| 22  | 13168-13680 (+)   | 170         | HNH homing endonuclease         | HNH endonuclease ( <i>Gramella forsetii</i> , WP_011710355, 122.9)                 | PF07463 (NUMOD4 motif), PF13392 (HNH endonuclease), PF00847 (AP2 domain)                    |
| 23  | 13693-14199 (+)   | 168         |                                 | hypothetical protein ( <i>Robiginitalea biformata</i> , WP_015755461, 49.3)        | COG1713                                                                                     |
| 24  | 15077-14796 (-)   | 93          |                                 | protein methyltransferase FrzF ( <i>Myxococcus xanthus</i> , WP_011554141, 35)     |                                                                                             |
| 25  | 15340-15966 (+)   | 208         |                                 | hypothetical protein ( <i>Chryseobacterium</i> sp. OV259, WP_034758591, 44.7)      |                                                                                             |
| 26  | 15956-19777 (+)   | 1273        | Tail length tape measure domain | tape measure domain (uncultured Mediterranean phage uvMED, BAQ84149, 308.9)        | PF05483 (Synaptonemal complex protein 1), COG3941, COG1196, COG0419, COG4372, COG0610, 2 TM |
| 27  | 19780-22008 (+)   | 742         |                                 | structural protein ( <i>Cellulophaga</i> phage phi19:1, YP_008241790, 266.2)       |                                                                                             |
| 28  | 22008-24047 (+)   | 679         |                                 | structural protein ( <i>Cellulophaga</i> phage phi19:1, YP_008241791, 179.5)       |                                                                                             |
| 29  | 24048-27041 (+)   | 997         |                                 | hypothetical protein ( <i>Mesorhizobium plurifarium</i> , WP_041005494, 165.3)     |                                                                                             |
| 30  | 27059-27346 (+)   | 95          |                                 | hypothetical protein ( <i>Kordia algicida</i> , WP_007093059, 48.9)                | 2 TM                                                                                        |

|    |                 |     |                                                |                                                                                                               |                                                            |
|----|-----------------|-----|------------------------------------------------|---------------------------------------------------------------------------------------------------------------|------------------------------------------------------------|
| 31 | 27336-27959 (+) | 207 |                                                | hypothetical protein ( <i>Genlisea aurea</i> , EPS66458, 38.1)                                                | TM                                                         |
| 32 | 27962-28318 (+) | 118 | Carboxypeptidase                               | hypothetical protein ( <i>Bizionia argentinensis</i> , WP_040287984, 157.5)                                   | PF13539 (D-alanyl-D-alanine carboxypeptidase), TM          |
| 33 | 28366-28776 (+) | 136 |                                                | hypothetical protein ( <i>Flavobacterium limnosediminis</i> , WP_023579384, 49.3)                             | TM                                                         |
| 34 | 28989-28753 (-) | 78  |                                                | hypothetical protein ( <i>Flavobacterium psychrophilum</i> , WP_044049352, 68.6)                              |                                                            |
| 35 | 29306-29037 (-) | 89  |                                                | unnamed protein product ( <i>Mus musculus</i> , BAE35476, 37.7)                                               |                                                            |
| 36 | 29758-29453 (-) | 101 |                                                | (protein-PII) uridylyltransferase ( <i>Azotobacter chroococcum</i> , WP_039802626, 38.9)                      |                                                            |
| 37 | 30622-29822 (-) | 266 | DNA methylase                                  | DNA methylase ( <i>Vibrio</i> phage pYD38-B, YP_008130270, 242.7)                                             | PF01555 (DNA methylase), COG0863, COG2189                  |
| 38 | 31562-30798 (-) | 254 | DNA methylase                                  | DNA methylase ( <i>Cellulophaga</i> phage phi12:1, YP_008240985, 305.4)                                       | PF01555 (DNA methylase), COG0863, COG2189                  |
| 39 | 31865-31689 (-) | 58  |                                                | hypothetical protein ( <i>Pseudocercospora fijiensis</i> CIRAD86, XP_007923413, 35.8)                         |                                                            |
| 40 | 32048-31896 (-) | 50  |                                                | hypothetical protein ( <i>Perkinsela</i> sp. CCAP 1560/4, KNH05471, 35.8)                                     |                                                            |
| 41 | 32327-32103 (-) | 74  |                                                | Hermansky-Pudlak syndrome 6 protein, partial ( <i>Nestor notabilis</i> , XP_010009980, 34.7)                  |                                                            |
| 42 | 33110-32343 (-) | 255 |                                                | hypothetical protein ( <i>Cellulophaga</i> phage phi18:3, YP_008241198, 85.5)                                 |                                                            |
| 43 | 33785-33117 (-) | 222 | Replication protein                            | DNA-binding protein ( <i>Campylobacter</i> sp. FOBRC14, WP_009651041, 120.9)                                  | PF13730 (Helix-turn-helix domain)                          |
| 44 | 34303-33899 (-) | 134 |                                                | hypothetical protein ( <i>Polaribacter</i> sp. Hel_I_88, WP_026776786, 100.9)                                 | PF01503 (Phosphoribosyl-ATP pyrophosphohydrolase)          |
| 45 | 34792-34313 (-) | 159 | Chromosomal replication initiator protein DnaA | chromosomal replication initiator protein DnaA ( <i>Lachnospiraceae bacterium</i> ND2006, WP_035638943, 60.8) | PF08299 (Bacterial dnaA protein helix-turn-helix), COG0593 |
| 46 | 35110-34880 (-) | 76  |                                                | hypothetical protein ( <i>Pedobacter</i> sp. BMA, WP_047801173, 40)                                           |                                                            |
| 47 | 35273-35085 (-) | 62  |                                                |                                                                                                               |                                                            |
| 48 | 35719-35273 (-) | 148 |                                                | hypothetical protein ( <i>Eremothecium cymbalariae</i> DBVPG#7215, XP_003645407, 37.7)                        |                                                            |
| 49 | 36383-35721 (-) | 220 | NinG recombination protein                     | hypothetical protein, partial (Proteobacteria bacterium JGI 0000113-P07, WP_036929766, 77)                    | PF05766 (Bacteriophage Lambda NinG protein)                |
| 50 | 36609-36361 (-) | 82  |                                                | unnamed protein product ( <i>Sordaria macrospora</i> k-hell, CCC10760, 37)                                    |                                                            |
| 51 | 36981-36676 (-) | 101 |                                                | hypothetical protein ( <i>Chromobacterium violaceum</i> , WP_043617948, 35.8)                                 |                                                            |
| 52 | 37294-37043 (-) | 83  |                                                | AsnC family transcriptional regulator ( <i>Selenomonas</i> sp. oral taxon 478, WP_050343091, 33.9)            |                                                            |
| 53 | 38053-37358 (-) | 231 | DNA methylase                                  | Phage DNA modification methylase ( <i>Microgenomates bacterium</i> GW2011_GWA2_46_16, KGU25463, 197.2)        | PF01555 (DNA methylase), COG0863, COG2521                  |
| 54 | 38896-38147 (-) | 249 | DNA methylase                                  | DNA methylase ( <i>Geobacillus</i> phage GBK2, YP_009010520, 261.2)                                           | PF01555 (DNA methylase), COG0863                           |
| 55 | 39300-39073 (-) | 75  |                                                | hypothetical protein ( <i>Cellulophaga</i> phage phi19:1, YP_008241803, 53.5)                                 |                                                            |
| 56 | 39484-39350 (-) | 44  |                                                |                                                                                                               |                                                            |

|    |                 |     |                  |                                                                                                          |                                                                   |
|----|-----------------|-----|------------------|----------------------------------------------------------------------------------------------------------|-------------------------------------------------------------------|
| 57 | 39823-39539 (-) | 94  |                  | hypothetical protein ( <i>Saccharospirillum impatiens</i> , WP_028669711, 37.7)                          |                                                                   |
| 58 | 40262-39969 (-) | 97  |                  | ABC transporter ATP-binding protein ( <i>Carnobacterium inhibens</i> , WP_034537685, 36.6)               |                                                                   |
| 59 | 40566-40318 (-) | 82  |                  | cobalamin synthesis protein ( <i>Theileria annulata</i> strain Ankara , XP_955279, 35.4)                 |                                                                   |
| 60 | 40908-40621 (-) | 95  |                  | MULTISPECIES: hypothetical protein ( <i>Pseudomonas putida</i> group, WP_019751570, 36.6)                |                                                                   |
| 61 | 41415-40975 (-) | 146 | HNH endonuclease | HNH endonuclease ( <i>Streptococcus constellatus</i> , WP_048800727, 131.3)                              | PF01844 (HNH endonuclease), COG1403                               |
| 62 | 41809-41480 (-) | 109 |                  | UDP-N-acetylglucosamine 2-epimerase ( <i>Paulinella chromatophora</i> , YP_002049387, 39.3)              |                                                                   |
| 63 | 42692-41919 (-) | 257 |                  | hypothetical protein ( <i>Flavobacterium</i> phage FCL-2, YP_009140550, 106.3)                           | TM                                                                |
| 64 | 43362-42697 (-) | 221 |                  | hypothetical protein, partial ( <i>Candidatus Caldatribacterium californiense</i> , WP_017890182, 77.4)  |                                                                   |
| 65 | 43513-43376 (-) | 45  |                  | hypothetical protein ( <i>Rhizopus microsporus</i> , CEI91090, 36.2)                                     | PF09889 (Uncharacterized protein containing a Zn-ribbon), COG4068 |
| 66 | 43709-43500 (-) | 69  |                  | hypothetical protein ( <i>Corynebacterium kroppenstedtii</i> DSM 44385, ACR18580, 34.7)                  |                                                                   |
| 67 | 43883-43740 (-) | 47  |                  | MerR family transcriptional regulator ( <i>Clostridium tetanomorphum</i> , WP_035151379, 35)             |                                                                   |
| 68 | 44096-43887 (-) | 69  |                  | sam/hd domain protein, putative ( <i>Entamoeba invadens</i> IP1, XP_004260964, 33.9)                     |                                                                   |
| 69 | 44296-44159 (-) | 45  |                  |                                                                                                          |                                                                   |
| 70 | 44454-44293 (-) | 53  |                  |                                                                                                          |                                                                   |
| 71 | 44844-44455 (-) | 129 |                  | hypothetical protein (uncultured Mediterranean phage uvMED, BAQ92845, 61.6)                              |                                                                   |
| 72 | 45071-44859 (-) | 70  |                  |                                                                                                          |                                                                   |
| 73 | 45734-45075 (-) | 219 |                  | hypothetical protein ( <i>Elizabethkingia anophelis</i> , WP_024566412, 62.4)                            |                                                                   |
| 74 | 46038-45748 (-) | 96  |                  | hypothetical protein ( <i>Enterococcus caccae</i> ATCC BAA-1240, EOL45101, 37.4)                         |                                                                   |
| 75 | 46252-46043 (-) | 69  |                  | polysaccharide biosynthesis protein CapD ( <i>Listeria cornellensis</i> FSL F6-969, EUJ25228, 36.2)      |                                                                   |
| 76 | 46687-46355 (-) | 110 |                  |                                                                                                          |                                                                   |
| 77 | 46870-46700 (-) | 56  |                  | twin-arginine translocation protein subunit TatB ( <i>Desulfovibrio salexigens</i> , WP_015851433, 33.5) |                                                                   |
| 78 | 47245-46940 (-) | 101 |                  | hypothetical protein ( <i>Calothrix</i> sp. PCC 7103, WP_019495525, 37.4)                                |                                                                   |
| 79 | 47486-47253 (-) | 77  |                  | hypothetical protein ( <i>Zavarzinella formosa</i> , WP_029630428, 60.8)                                 |                                                                   |
| 80 | 47827-47498 (-) | 109 |                  | UNKNOWN ( <i>Stylonychia lemnae</i> , CDW79434, 37)                                                      |                                                                   |
| 81 | 48090-47860 (-) | 76  |                  |                                                                                                          | TM                                                                |
| 82 | 48340-48152 (-) | 62  |                  |                                                                                                          |                                                                   |

|    |                 |    |                                                                                                  |    |
|----|-----------------|----|--------------------------------------------------------------------------------------------------|----|
| 83 | 48697-48464 (-) | 77 | myelin transcription factor 1-like protein isoform X6 ( <i>Esox lucius</i> , XP_010893337, 37.7) |    |
| 84 | 48976-48755 (-) | 73 | hypothetical protein ( <i>Listeria</i> phage LP-037, YP_008240523, 45.8)                         |    |
| 85 | 49134-49021 (-) | 37 |                                                                                                  | TM |
| 86 | 49377-49231 (-) | 48 |                                                                                                  |    |

---

COG and Pfam were searched by RPS-BLAST against CDD. Additional Pfam search was performed by hmmscan during HMMER analysis. SP and TM were predicted by the Phobius program as implemented at the HMMER web server.
